# Supplementary material for: Lactose Glycation of the Maillard-Type Impairs the Benefits of Caseinate Digest to the Weaned Rats for Intestinal Morphology and Serum Biochemistry
Source: MDPI journal article supplement (doi:10.3390/foods10092104), 2021-09-06
Supplement: s1 [file s1]

## Supplementary Materials

**Table S1.** Several growth performance indices of the rats in response to the intake of caseinate (CN) digest and glycated caseinate (GCN) digest.

| Index                                                    | Control                    | CN digest (mg/kg BW/d)     |                             |                             | GCN digest (mg/kg BW/d)    |                            |                            |
|----------------------------------------------------------|----------------------------|----------------------------|-----------------------------|-----------------------------|----------------------------|----------------------------|----------------------------|
|                                                          |                            | 100                        | 200                         | 400                         | 100                        | 200                        | 400                        |
| Initial body weight (g)                                  | 55.27 ± 0.41 <sup>a</sup>  | 55.15 ± 0.34 <sup>a</sup>  | 55.40 ± 0.37 <sup>a</sup>   | 55.23 ± 0.32 <sup>a</sup>   | 55.43 ± 0.40 <sup>a</sup>  | 55.50 ± 0.28 <sup>a</sup>  | 55.34 ± 0.32 <sup>a</sup>  |
| Body weight at day 7 (g)                                 | 110.68 ± 1.60 <sup>b</sup> | 114.81 ± 2.20 <sup>c</sup> | 116.40 ± 1.94 <sup>cd</sup> | 116.70 ± 1.19 <sup>d</sup>  | 111.85 ± 1.85 <sup>b</sup> | 114.57 ± 1.33 <sup>c</sup> | 107.37 ± 1.28 <sup>a</sup> |
| Final body weight (g)                                    | 279.73 ± 7.79 <sup>a</sup> | 283.63 ± 8.21 <sup>a</sup> | 285.67 ± 11.68 <sup>a</sup> | 286.50 ± 12.06 <sup>a</sup> | 281.10 ± 9.57 <sup>a</sup> | 283.67 ± 4.76 <sup>a</sup> | 274.63 ± 7.13 <sup>a</sup> |
| Total weight gain at 0-7 d (g/d)                         | 55.41 ± 1.63 <sup>b</sup>  | 59.66 ± 2.04 <sup>cd</sup> | 60.99 ± 1.60 <sup>cd</sup>  | 61.47 ± 1.28 <sup>d</sup>   | 56.41 ± 1.68 <sup>b</sup>  | 59.06 ± 1.53 <sup>c</sup>  | 52.03 ± 1.54 <sup>a</sup>  |
| Total weight gain at 0-28 d (g/d)                        | 224.46 ± 7.43 <sup>a</sup> | 228.48 ± 8.21 <sup>a</sup> | 230.26 ± 11.33 <sup>a</sup> | 231.27 ± 12.05 <sup>a</sup> | 225.67 ± 9.65 <sup>a</sup> | 228.16 ± 4.49 <sup>a</sup> | 219.29 ± 7.18 <sup>a</sup> |
| Initial weight of small intestine (g)                    | 2.53 ± 0.30                | 2.53 ± 0.30                | 2.53 ± 0.30                 | 2.53 ± 0.30                 | 2.53 ± 0.30                | 2.53 ± 0.30                | 2.53 ± 0.30                |
| Weight of small intestine at 7 d (g)                     | 3.87 ± 0.08 <sup>bc</sup>  | 3.95 ± 0.03 <sup>c</sup>   | 4.13 ± 0.12 <sup>d</sup>    | 4.33 ± 0.08 <sup>e</sup>    | 3.84 ± 0.07 <sup>b</sup>   | 3.96 ± 0.08 <sup>c</sup>   | 3.66 ± 0.06 <sup>a</sup>   |
| Weight of small intestine at 28 d (g)                    | 6.23 ± 0.17 <sup>a</sup>   | 6.81 ± 0.07 <sup>c</sup>   | 6.85 ± 0.10 <sup>c</sup>    | 7.06 ± 0.13 <sup>d</sup>    | 6.53 ± 0.10 <sup>b</sup>   | 6.84 ± 0.11 <sup>c</sup>   | 6.16 ± 0.17 <sup>a</sup>   |
| Total gain of small intestine weight at 0-7 d (g/d)      | 1.34 ± 0.08 <sup>bc</sup>  | 1.42 ± 0.03 <sup>c</sup>   | 1.61 ± 0.12 <sup>d</sup>    | 1.80 ± 0.08 <sup>e</sup>    | 1.31 ± 0.07 <sup>b</sup>   | 1.43 ± 0.08 <sup>c</sup>   | 1.14 ± 0.06 <sup>a</sup>   |
| Total gain of small intestine weight at the 0-28 d (g/d) | 3.70 ± 0.17 <sup>a</sup>   | 4.28 ± 0.07 <sup>c</sup>   | 4.32 ± 0.10 <sup>c</sup>    | 4.53 ± 0.13 <sup>d</sup>    | 4.01 ± 0.10 <sup>b</sup>   | 4.31 ± 0.11 <sup>c</sup>   | 3.63 ± 0.17 <sup>a</sup>   |
| Initial length of small intestine (cm)                   | 64.61 ± 1.50               | 64.61 ± 1.50               | 64.61 ± 1.50                | 64.61 ± 1.50                | 64.61 ± 1.50               | 64.61 ± 1.50               | 64.61 ± 1.50               |
| length of small intestine at 7 d (cm)                    | 71.07 ± 1.24 <sup>ab</sup> | 72.51 ± 0.94 <sup>cd</sup> | 73.62 ± 0.97 <sup>de</sup>  | 74.92 ± 1.37 <sup>e</sup>   | 71.70 ± 0.61 <sup>bc</sup> | 72.65 ± 1.16 <sup>cd</sup> | 69.82 ± 0.75 <sup>a</sup>  |
| length of small intestine at 28 d (cm)                   | 92.43 ± 1.55 <sup>b</sup>  | 95.58 ± 1.02 <sup>c</sup>  | 97.13 ± 1.42 <sup>c</sup>   | 99.83 ± 1.16 <sup>d</sup>   | 91.20 ± 1.36 <sup>b</sup>  | 91.90 ± 2.26 <sup>b</sup>  | 88.53 ± 2.66 <sup>a</sup>  |
| Total length gain of small intestine at 0-7 d (cm)       | 6.46 ± 1.24 <sup>ab</sup>  | 7.90 ± 0.94 <sup>cd</sup>  | 9.01 ± 0.97 <sup>de</sup>   | 10.31 ± 1.37 <sup>e</sup>   | 7.09 ± 0.61 <sup>bc</sup>  | 8.04 ± 1.16 <sup>cd</sup>  | 5.21 ± 0.57 <sup>a</sup>   |
| Total length gain of small intestine at 0-28 d (cm)      | 27.82 ± 1.55 <sup>b</sup>  | 30.97 ± 1.02 <sup>c</sup>  | 32.52 ± 1.42 <sup>c</sup>   | 35.22 ± 1.16 <sup>d</sup>   | 26.59 ± 1.36 <sup>b</sup>  | 27.29 ± 2.26 <sup>b</sup>  | 23.92 ± 2.66 <sup>a</sup>  |

Values are reported as means ± standard deviations (n = 6); different lowercase letters after the values as the superscripts in the same row indicate that one-way ANOVA of the means differs significantly ( $p < 0.05$ ).

**Table S2.** Small intestinal morphology of the rats in different groups in response to the intake of caseinate (CN) digest and glycated caseinate (GCN) digest.

| Index    | Time (d) | Control                      | CN digest (mg/kg BW/d)      |                             |                             | GCN digest (mg/kg BW/d)      |                             |                             |
|----------|----------|------------------------------|-----------------------------|-----------------------------|-----------------------------|------------------------------|-----------------------------|-----------------------------|
|          |          |                              | 100                         | 200                         | 400                         | 100                          | 200                         | 400                         |
| Duodenum |          |                              |                             |                             |                             |                              |                             |                             |
| VH (μm)  | 7        | 352.30 ± 11.33 <sup>b</sup>  | 386.10 ± 6.55 <sup>d</sup>  | 401.30 ± 9.91 <sup>e</sup>  | 413.63 ± 7.34 <sup>f</sup>  | 366.87 ± 12.85 <sup>c</sup>  | 381.93 ± 7.11 <sup>d</sup>  | 332.9 ± 7.29 <sup>a</sup>   |
|          | 28       | 373.18 ± 9.61 <sup>b</sup>   | 400.35 ± 11.80 <sup>c</sup> | 414.32 ± 5.80 <sup>cd</sup> | 426.10 ± 6.65 <sup>e</sup>  | 378.03 ± 4.73 <sup>b</sup>   | 401.81 ± 5.12 <sup>c</sup>  | 337.20 ± 4.65 <sup>a</sup>  |
| CD (μm)  | 7        | 139.80 ± 8.02 <sup>cd</sup>  | 132.23 ± 4.07 <sup>ab</sup> | 128.67 ± 4.24 <sup>ab</sup> | 127.30 ± 3.26 <sup>a</sup>  | 134.30 ± 2.04 <sup>bc</sup>  | 130.77 ± 2.50 <sup>ab</sup> | 142.47 ± 3.65 <sup>d</sup>  |
|          | 28       | 161.87 ± 4.66 <sup>e</sup>   | 146.26 ± 5.47 <sup>c</sup>  | 138.85 ± 5.10 <sup>ab</sup> | 133.42 ± 6.72 <sup>a</sup>  | 155.41 ± 3.50 <sup>d</sup>   | 141.21 ± 1.29 <sup>bc</sup> | 155.08 ± 5.12 <sup>d</sup>  |
| VH/CD    | 7        | 2.52 ± 0.10 <sup>b</sup>     | 2.92 ± 0.10 <sup>d</sup>    | 3.12 ± 0.11 <sup>e</sup>    | 3.25 ± 0.07 <sup>f</sup>    | 2.73 ± 0.06 <sup>c</sup>     | 2.92 ± 0.04 <sup>d</sup>    | 2.34 ± 0.04 <sup>a</sup>    |
|          | 28       | 2.31 ± 0.09 <sup>b</sup>     | 2.74 ± 0.08 <sup>d</sup>    | 2.99 ± 0.10 <sup>e</sup>    | 3.20 ± 0.16 <sup>f</sup>    | 2.43 ± 0.03 <sup>c</sup>     | 2.85 ± 0.06 <sup>d</sup>    | 2.18 ± 0.04 <sup>a</sup>    |
| Jejunum  |          |                              |                             |                             |                             |                              |                             |                             |
| VH (μm)  | 7        | 331.07 ± 8.46 <sup>b</sup>   | 371.87 ± 5.61 <sup>d</sup>  | 390.10 ± 8.53 <sup>e</sup>  | 395.57 ± 6.76 <sup>e</sup>  | 360.53 ± 11.32 <sup>c</sup>  | 371.43 ± 6.72 <sup>d</sup>  | 316.20 ± 8.84 <sup>a</sup>  |
|          | 28       | 363.94 ± 11.28 <sup>b</sup>  | 386.01 ± 5.21 <sup>c</sup>  | 398.49 ± 7.33 <sup>d</sup>  | 410.40 ± 12.51 <sup>e</sup> | 369.9 ± 4.48 <sup>b</sup>    | 394.10 ± 8.87 <sup>cd</sup> | 322.19 ± 4.35 <sup>a</sup>  |
| CD (μm)  | 7        | 135.20 ± 5.09 <sup>bc</sup>  | 134.47 ± 2.18 <sup>b</sup>  | 128.77 ± 5.42 <sup>a</sup>  | 123.80 ± 4.64 <sup>a</sup>  | 136.43 ± 3.08 <sup>b</sup>   | 128.07 ± 2.68 <sup>a</sup>  | 139.40 ± 2.59 <sup>b</sup>  |
|          | 28       | 157.61 ± 2.89 <sup>c</sup>   | 143.10 ± 9.96 <sup>b</sup>  | 134.11 ± 4.99 <sup>ab</sup> | 131.29 ± 8.46 <sup>a</sup>  | 157.5 ± 4.66 <sup>c</sup>    | 140.90 ± 9.53 <sup>b</sup>  | 154.71 ± 5.03 <sup>c</sup>  |
| VH/CD    | 7        | 2.45 ± 0.09 <sup>b</sup>     | 2.77 ± 0.03 <sup>cd</sup>   | 3.03 ± 0.14 <sup>e</sup>    | 3.20 ± 0.16 <sup>f</sup>    | 2.64 ± 0.12 <sup>c</sup>     | 2.90 ± 0.07 <sup>de</sup>   | 2.27 ± 0.10 <sup>a</sup>    |
|          | 28       | 2.31 ± 0.06 <sup>b</sup>     | 2.71 ± 0.20 <sup>bc</sup>   | 2.97 ± 0.10 <sup>de</sup>   | 3.13 ± 0.14 <sup>e</sup>    | 2.35 ± 0.07 <sup>b</sup>     | 2.81 ± 0.20 <sup>cd</sup>   | 2.08 ± 0.07 <sup>a</sup>    |
| Ileum    |          |                              |                             |                             |                             |                              |                             |                             |
| VH (μm)  | 7        | 239.17 ± 10.41 <sup>b</sup>  | 263.9 ± 6.97 <sup>c</sup>   | 268.03 ± 10.54 <sup>c</sup> | 273.73 ± 14.53 <sup>c</sup> | 242.77 ± 10.01 <sup>b</sup>  | 249.8 ± 5.08 <sup>b</sup>   | 219.8 ± 5.93 <sup>a</sup>   |
|          | 28       | 260.93 ± 12.25 <sup>ab</sup> | 277.26 ± 9.12 <sup>cd</sup> | 288.64 ± 6.70 <sup>d</sup>  | 284.14 ± 9.60 <sup>d</sup>  | 266.58 ± 4.89 <sup>abc</sup> | 271.45 ± 7.66 <sup>bc</sup> | 258.35 ± 13.06 <sup>a</sup> |
| CD (μm)  | 7        | 104.43 ± 5.58 <sup>a</sup>   | 103.27 ± 4.10 <sup>a</sup>  | 102.97 ± 3.79 <sup>a</sup>  | 99.5 ± 5.21 <sup>a</sup>    | 97.27 ± 2.95 <sup>a</sup>    | 98.93 ± 7.82 <sup>a</sup>   | 100.90 ± 3.50 <sup>a</sup>  |
|          | 28       | 129.52 ± 5.80 <sup>bc</sup>  | 124.66 ± 4.55 <sup>b</sup>  | 116.52 ± 3.38 <sup>a</sup>  | 113.84 ± 6.70 <sup>a</sup>  | 125.96 ± 4.08 <sup>b</sup>   | 115.58 ± 2.90 <sup>a</sup>  | 133.52 ± 4.83 <sup>c</sup>  |
| VH/CD    | 7        | 2.30 ± 0.17 <sup>a</sup>     | 2.56 ± 0.17 <sup>bc</sup>   | 2.61 ± 0.13 <sup>bc</sup>   | 2.76 ± 0.23 <sup>c</sup>    | 2.50 ± 0.05 <sup>b</sup>     | 2.54 ± 0.19 <sup>b</sup>    | 2.18 ± 0.03 <sup>a</sup>    |
|          | 28       | 2.02 ± 0.13 <sup>ab</sup>    | 2.23 ± 0.10 <sup>cd</sup>   | 2.48 ± 0.09 <sup>ef</sup>   | 2.50 ± 0.15 <sup>f</sup>    | 2.12 ± 0.04 <sup>bc</sup>    | 2.35 ± 0.11 <sup>de</sup>   | 1.94 ± 0.12 <sup>a</sup>    |

VH = Villus height; CD = Crypt depth; VH/CD = Villus height to crypt depth ratio. Values are reported as means ± standard deviations; different lowercase letters after the values as the superscripts in the same row indicate that one-way ANOVA of the means differs significantly ( $p < 0.05$ ).

**Table S3.** Several hematological parameters for serum biochemistry of the rats in response to the intake of caseinate (CN) digest and glycated caseinate (GCN) digest.

| Index                       | Time (d) | Control                    | CN digest (mg/kg BW/d)      |                             |                             | GCN digest (mg/kg BW/d)    |                            |                             |
|-----------------------------|----------|----------------------------|-----------------------------|-----------------------------|-----------------------------|----------------------------|----------------------------|-----------------------------|
|                             |          |                            | 100                         | 200                         | 400                         | 100                        | 200                        | 400                         |
| Total protein (g/L)         | 7        | 42.21 ± 1.55 <sup>b</sup>  | 44.39 ± 1.17 <sup>cd</sup>  | 45.47 ± 1.34 <sup>de</sup>  | 47.29 ± 1.36 <sup>bc</sup>  | 42.41 ± 1.36 <sup>bc</sup> | 43.17 ± 1.36 <sup>bc</sup> | 39.72 ± 2.16 <sup>a</sup>   |
|                             | 28       | 47.44 ± 2.59 <sup>b</sup>  | 48.70 ± 2.84 <sup>b</sup>   | 49.84 ± 2.44 <sup>bc</sup>  | 52.49 ± 3.28 <sup>c</sup>   | 46.55 ± 2.75 <sup>b</sup>  | 47.95 ± 2.75 <sup>b</sup>  | 41.27 ± 2.27 <sup>a</sup>   |
| High-density lipoprotein    | 7        | 1.18 ± 0.05 <sup>a</sup>   | 1.32 ± 0.06 <sup>abc</sup>  | 1.45 ± 0.07 <sup>cd</sup>   | 1.57 ± 0.07 <sup>d</sup>    | 1.26 ± 0.10 <sup>ab</sup>  | 1.35 ± 0.08 <sup>bc</sup>  | 1.17 ± 0.05 <sup>a</sup>    |
|                             | 28       | 1.21 ± 0.06 <sup>a</sup>   | 1.44 ± 0.06 <sup>c</sup>    | 1.57 ± 0.07 <sup>d</sup>    | 1.67 ± 0.05 <sup>e</sup>    | 1.35 ± 0.06 <sup>b</sup>   | 1.48 ± 0.07 <sup>c</sup>   | 1.20 ± 0.06 <sup>a</sup>    |
| Albumin (g/L)               | 7        | 30.66 ± 1.68 <sup>ab</sup> | 32.19 ± 1.21 <sup>ab</sup>  | 35.35 ± 1.61 <sup>c</sup>   | 35.27 ± 1.06 <sup>c</sup>   | 31.28 ± 1.60 <sup>ab</sup> | 32.54 ± 1.79 <sup>b</sup>  | 30.20 ± 1.67 <sup>a</sup>   |
|                             | 28       | 34.31 ± 2.41 <sup>ab</sup> | 35.22 ± 2.23 <sup>a</sup>   | 36.72 ± 1.80 <sup>b</sup>   | 37.60 ± 2.22 <sup>b</sup>   | 34.70 ± 2.56 <sup>ab</sup> | 37.03 ± 2.93 <sup>b</sup>  | 32.46 ± 1.72 <sup>a</sup>   |
| Globulin (g/L)              | 7        | 9.67 ± 0.43 <sup>a</sup>   | 11.83 ± 0.70 <sup>cd</sup>  | 12.55 ± 0.70 <sup>de</sup>  | 13.14 ± 1.05 <sup>e</sup>   | 10.79 ± 0.49 <sup>b</sup>  | 11.49 ± 0.56 <sup>bc</sup> | 9.36 ± 0.26 <sup>a</sup>    |
|                             | 28       | 10.71 ± 0.26 <sup>b</sup>  | 12.13 ± 0.84 <sup>c</sup>   | 13.77 ± 0.63 <sup>d</sup>   | 15.61 ± 0.85 <sup>e</sup>   | 11.25 ± 0.52 <sup>b</sup>  | 12.46 ± 0.53 <sup>c</sup>  | 9.75 ± 0.57 <sup>a</sup>    |
| Creatinine (μmol/L)         | 7        | 32.98 ± 2.01 <sup>a</sup>  | 33.36 ± 1.61 <sup>a</sup>   | 34.33 ± 1.73 <sup>a</sup>   | 34.84 ± 2.10 <sup>a</sup>   | 38.00 ± 1.81 <sup>b</sup>  | 39.38 ± 2.23 <sup>b</sup>  | 41.83 ± 1.72 <sup>c</sup>   |
|                             | 28       | 34.78 ± 2.18 <sup>a</sup>  | 35.08 ± 2.41 <sup>a</sup>   | 36.76 ± 1.38 <sup>a</sup>   | 37.11 ± 1.08 <sup>a</sup>   | 37.20 ± 1.57 <sup>a</sup>  | 42.32 ± 1.57 <sup>b</sup>  | 47.32 ± 2.41 <sup>c</sup>   |
| Creatinine (μmol/L)         | 7        | 108.37 ± 5.13 <sup>a</sup> | 110.69 ± 5.34 <sup>ab</sup> | 115.60 ± 4.29 <sup>bc</sup> | 117.34 ± 4.16 <sup>c</sup>  | 119.12 ± 2.64 <sup>c</sup> | 124.70 ± 3.28 <sup>d</sup> | 130.20 ± 4.33 <sup>e</sup>  |
|                             | 28       | 109.15 ± 5.73 <sup>a</sup> | 111.81 ± 4.30 <sup>ab</sup> | 115.51 ± 4.52 <sup>ab</sup> | 118.78 ± 4.55 <sup>bc</sup> | 116.59 ± 5.65 <sup>b</sup> | 125.43 ± 6.38 <sup>c</sup> | 132.89 ± 5.05 <sup>d</sup>  |
| Total bilirubin (μmol/L)    | 7        | 0.69 ± 0.05 <sup>a</sup>   | 0.73 ± 0.06 <sup>ab</sup>   | 0.75 ± 0.05 <sup>b</sup>    | 0.77 ± 0.04 <sup>b</sup>    | 0.76 ± 0.03 <sup>b</sup>   | 0.85 ± 0.04 <sup>c</sup>   | 0.93 ± 0.04 <sup>d</sup>    |
|                             | 28       | 0.76 ± 0.05 <sup>a</sup>   | 0.80 ± 0.04 <sup>ab</sup>   | 0.81 ± 0.04 <sup>ab</sup>   | 0.83 ± 0.04 <sup>b</sup>    | 0.93 ± 0.04 <sup>c</sup>   | 1.03 ± 0.03 <sup>d</sup>   | 1.11 ± 0.05 <sup>e</sup>    |
| Alkaline phosphatase (IU/L) | 7        | 215.00 ± 4.33 <sup>a</sup> | 217.03 ± 3.67 <sup>a</sup>  | 219.12 ± 4.89 <sup>ab</sup> | 221.29 ± 2.99 <sup>ab</sup> | 226.36 ± 7.22 <sup>b</sup> | 247.26 ± 8.59 <sup>c</sup> | 277.02 ± 10.05 <sup>d</sup> |
|                             | 28       | 218.10 ± 8.30 <sup>a</sup> | 220.25 ± 6.06 <sup>a</sup>  | 228.08 ± 6.71 <sup>b</sup>  | 231.13 ± 4.45 <sup>b</sup>  | 229.21 ± 6.81 <sup>b</sup> | 249.30 ± 5.06 <sup>c</sup> | 281.25 ± 4.02 <sup>d</sup>  |

Values are reported as means ± standard deviations (n = 6); different lowercase letters after the values as the superscripts in the same row indicate that one-way ANOVA of the means differs significantly ( $p < 0.05$ ).
